# Supplementary material
Source: PubMed Central journal article supplement (PMC5445385)
Supplement: NIHMS859714-supplement-10858_2017_89_MOESM1_ESM.pdf [file NIHMS859714-supplement-10858_2017_89_MOESM1_ESM.pdf]

## Supporting Information

for

### On the use of ultracentrifugal devices for routine sample preparation in biomolecular magic-angle-spinning NMR

Abhishek Mandal<sup>1</sup>, Jennifer C. Boatz<sup>1</sup>, Travis Wheeler<sup>2</sup> and Patrick C. A. van der Wel<sup>1\*</sup>

**Affiliations:**

<sup>1</sup>Department of Structural Biology, University of Pittsburgh School of Medicine, Pittsburgh, Pennsylvania 15260, USA

<sup>2</sup>Department of Cell Biology, University of Pittsburgh School of Medicine, Pittsburgh, Pennsylvania 15260, USA

\*Corresponding author. Email – [vanderwel@pitt.edu](mailto:vanderwel@pitt.edu). Phone – (412) 383-9896. Fax – (412) 648-9008

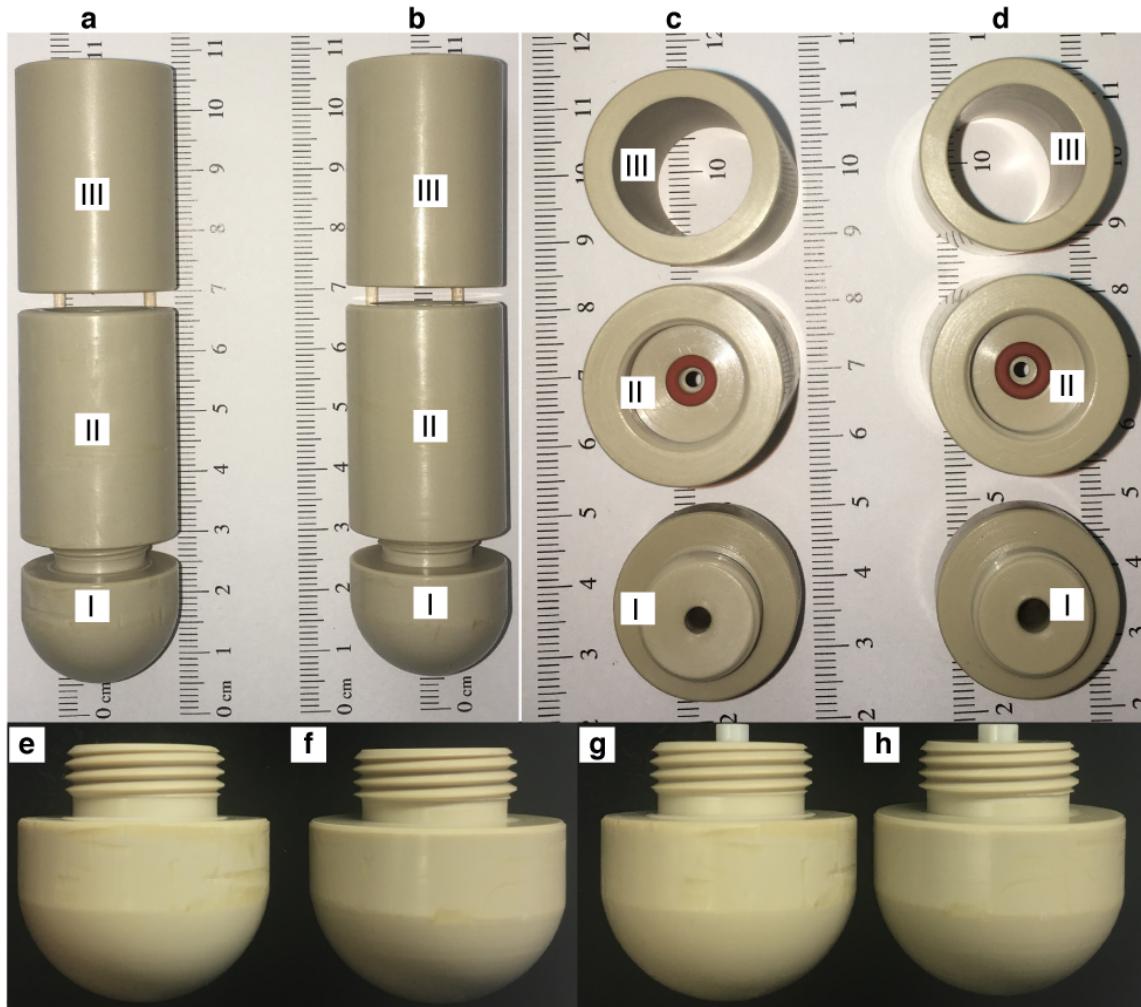

**Figure S1.** Photos of the ultracentrifugal devices for packing 3.2 mm and 4 mm Bruker MAS rotors. The component naming scheme is same as in Figure 1 in the main text. (a) and (c) 3.2 mm packing tool, (b) and (d) 4 mm packing tool. Panels (a) and (b) show the two packing tools side-by-side. Panels (c) and (d) show the internal differences in components I and II between the two tools, necessary to accommodate the different rotor sizes. Part III is identical in both tools. Panels (e,f) show a sideways view of part I of the 3.2 mm packing device, without and with the rotor in place, respectively. Panels (g,h) show a sideways view of part I of the 4 mm packing device, without and with the rotor in place, respectively.

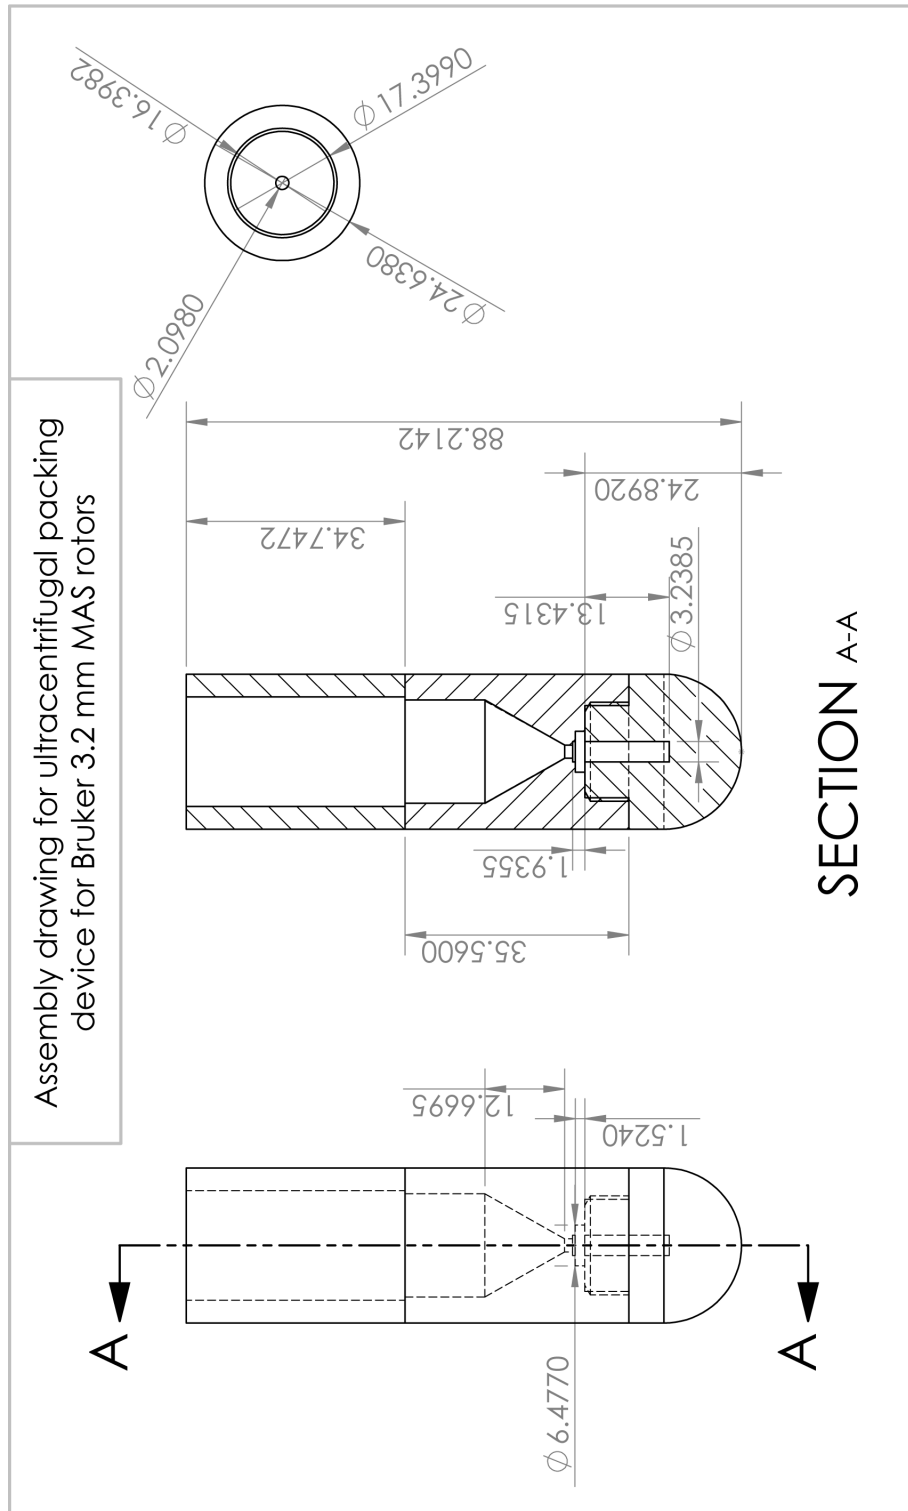

**Figure S2.** Assembly drawing of the ultracentrifugal packing device for use with 3.2 mm Bruker MAS rotors. All indicated dimensions reflect mm. From left to right: Side view of assembled device, with internals shown as dashed lines; section view along the indicated “A” line from the left-most panel; Top view showing diameters and thicknesses of the cylindrical parts of the assembly.

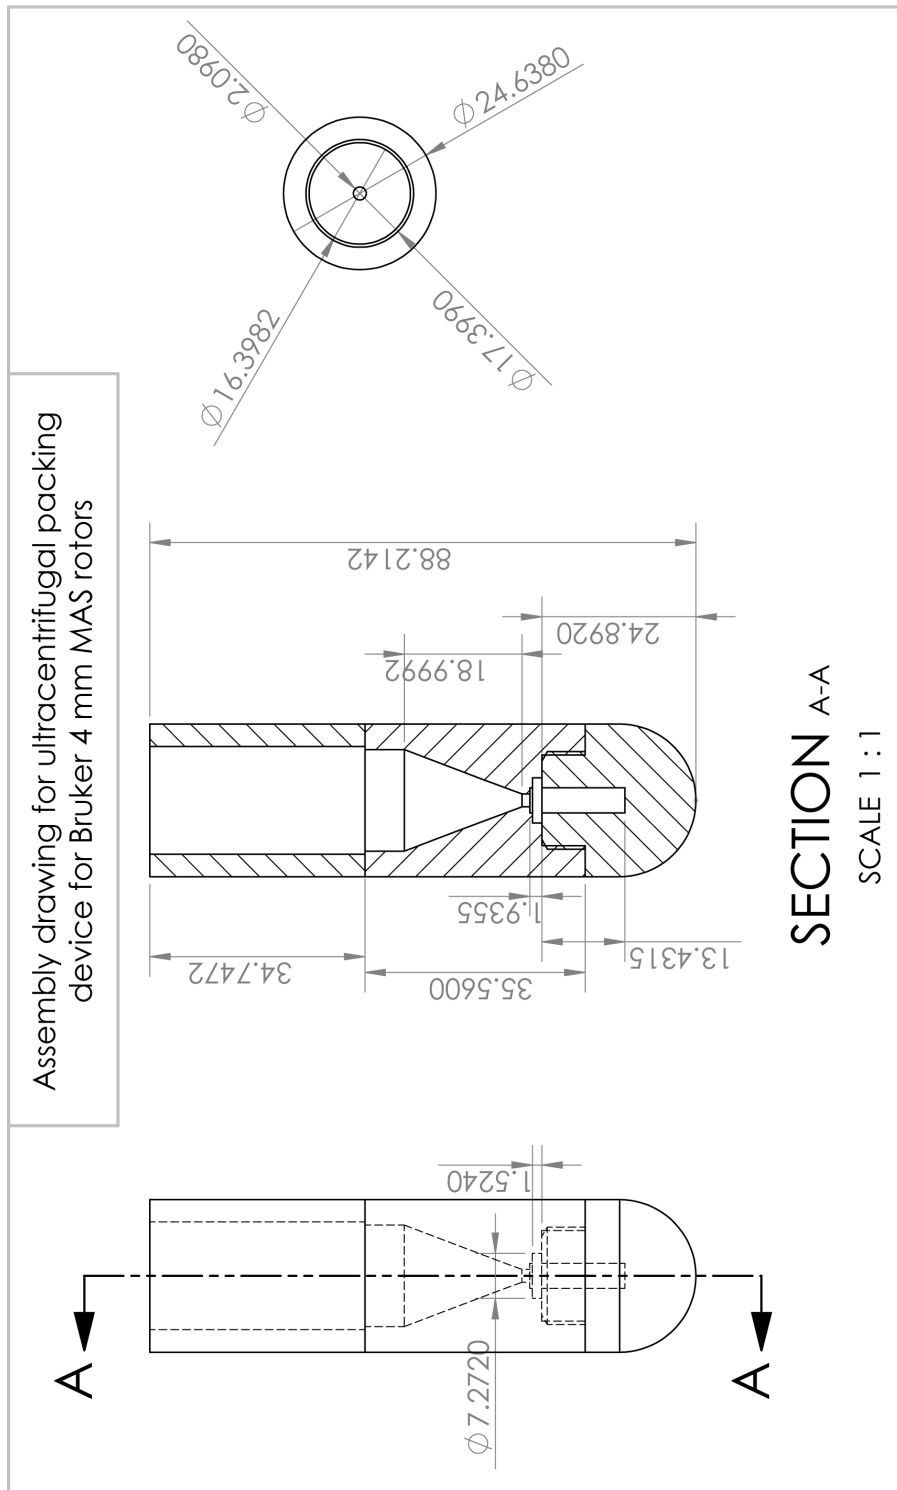

**Figure S3.** Assembly drawing of the ultracentrifugal packing device for use with 4 mm Bruker MAS rotors. All indicated dimensions reflect mm. From left to right: Side view of assembled device, with internals shown as dashed lines; Section view along the indicated “A” line from the left-most panel; Top view showing diameters and thicknesses of the cylindrical parts of the assembly.
